# Supplementary material for: Towards thrombosis-targeted zeolitenanoparticles for laser-polarized129Xe MRI
Source: Royal Society of Chemistry journal article supplement (doi:10.1039/b810253h), 2008-11-25
Supplement: b810253h.pdf [file b810253h.pdf]

## Supplementary Materials

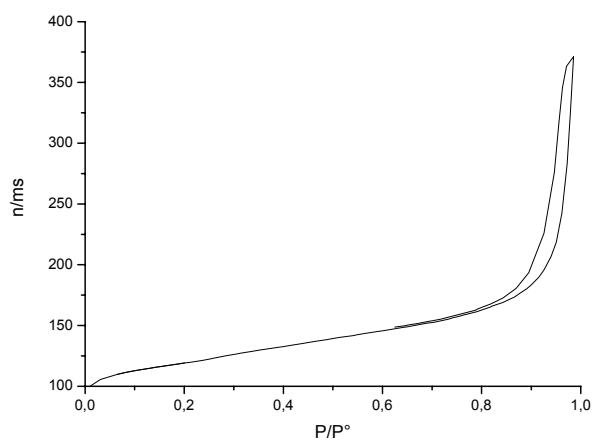

**Figure S1** BET diagram of silicalite-1 nanoparticles

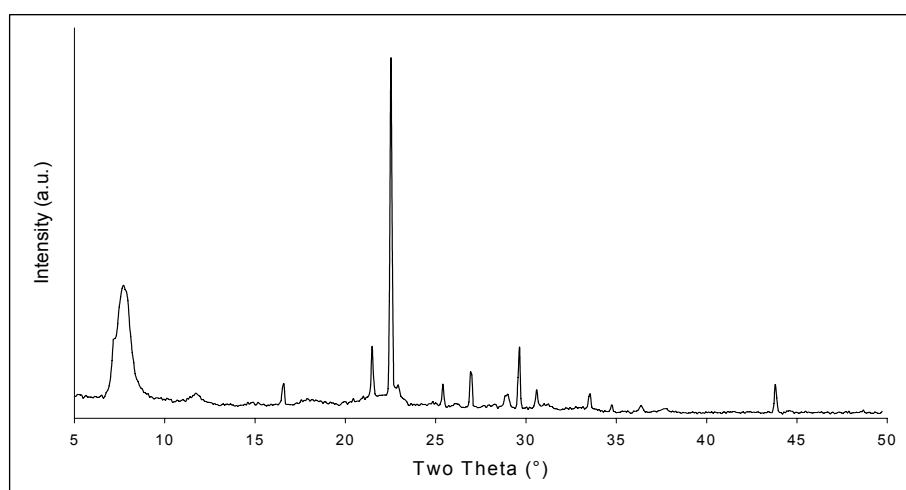

**Figure S2** : X-ray diffraction of the silicalite-1 nanoparticles

## Data for peptides 1 and 2

### Peptide 2

MALDI-TOF spectrum of the RP-HPLC purified peptide 1 ( $\alpha$ -cyano-4-hydroxycinnamic acid used as matrix). Voyager MALDI-TOF spectrometer (Applied Biosystems).

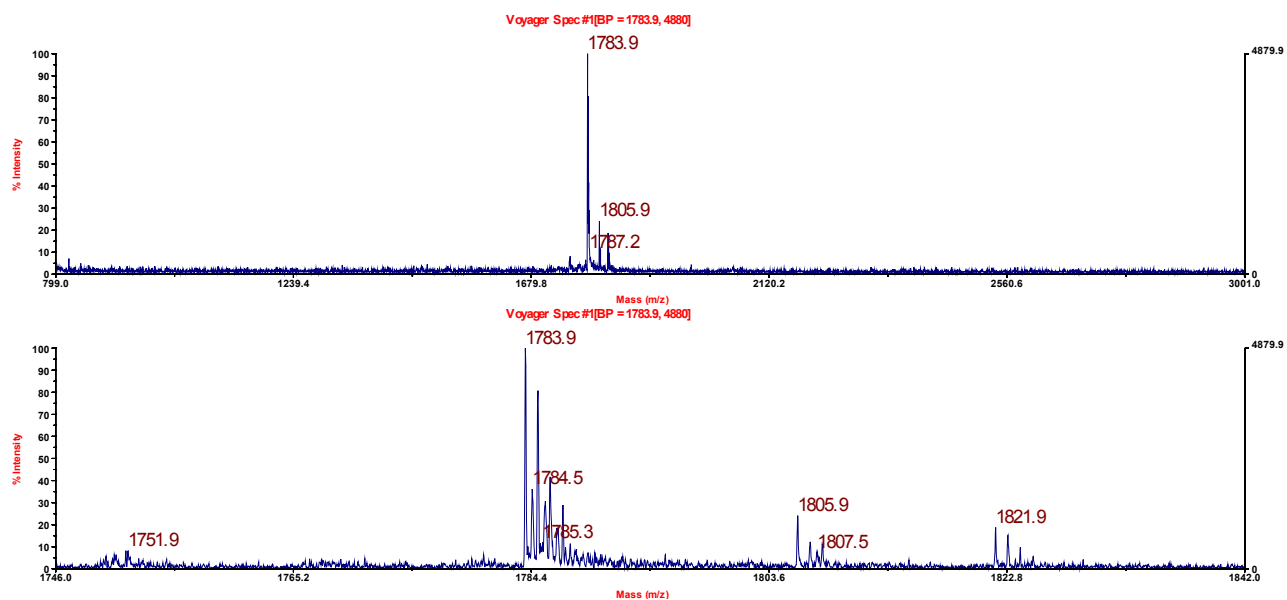

RP-HPLC analysis of the purified peptide 2

Eluent A: water containing 0.05% TFA

Eluent B: CH<sub>3</sub>CN/water: 4/1 by vol containing 0.05% TFA

Linear gradient 0-100% B in 30 min, detection at 215 nm, 50°C

| SAMPLE INFORMATION                                        |                            |                     |                              |
|-----------------------------------------------------------|----------------------------|---------------------|------------------------------|
| Sample Name:                                              | CA15 gd linker COCHO 41 mg | Acquired By:        | eric                         |
| Sample Type                                               | Unknown                    | Date Acquired:      | 12/13/2006 2:52:09 PM        |
| Vial:                                                     | 30                         | Acq. Method Set:    | 30 min CH <sub>3</sub> CN MS |
| Injection #:                                              | 1                          | Date Processed:     | 12/13/2006 3:33:57 PM        |
| Injection Volume:                                         | 10.00 ul                   | Processing Method:  | t                            |
| Run Time:                                                 | 30.0 Minutes               | Channel Name:       | WvIn Ch1                     |
| Sample Set Name:                                          | ca15 a15                   | Proc. Chnl. Descr.: | PDA 215.0 nm                 |
| Colonne                                                   | C18 Symetrie               | Temperature         | 50 C                         |
| Solvent H <sub>2</sub> O/TFA 0.05%/CH <sub>3</sub> CN 80% |                            |                     |                              |

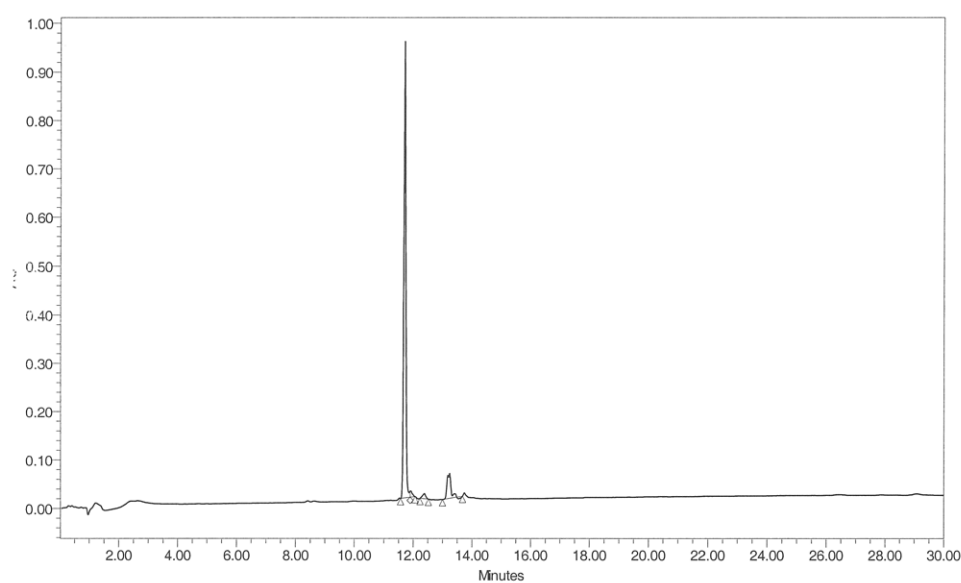

|   | RT     | Area    | % Area | Height |
|---|--------|---------|--------|--------|
| 1 | 11.701 | 4545080 | 87.39  | 923628 |
| 2 | 11.917 | 61842   | 1.19   | 13063  |
| 3 | 12.379 | 80597   | 1.55   | 10486  |
| 4 | 13.241 | 513316  | 9.87   | 51387  |

## Peptide 1

MALDI-TOF spectrum of the RP-HPLC purified peptide ( $\alpha$ -cyano- $\beta$ -hydroxycinnamic acid used as matrix). Voyager MALDI-TOF spectrometer (Applied Biosystems).

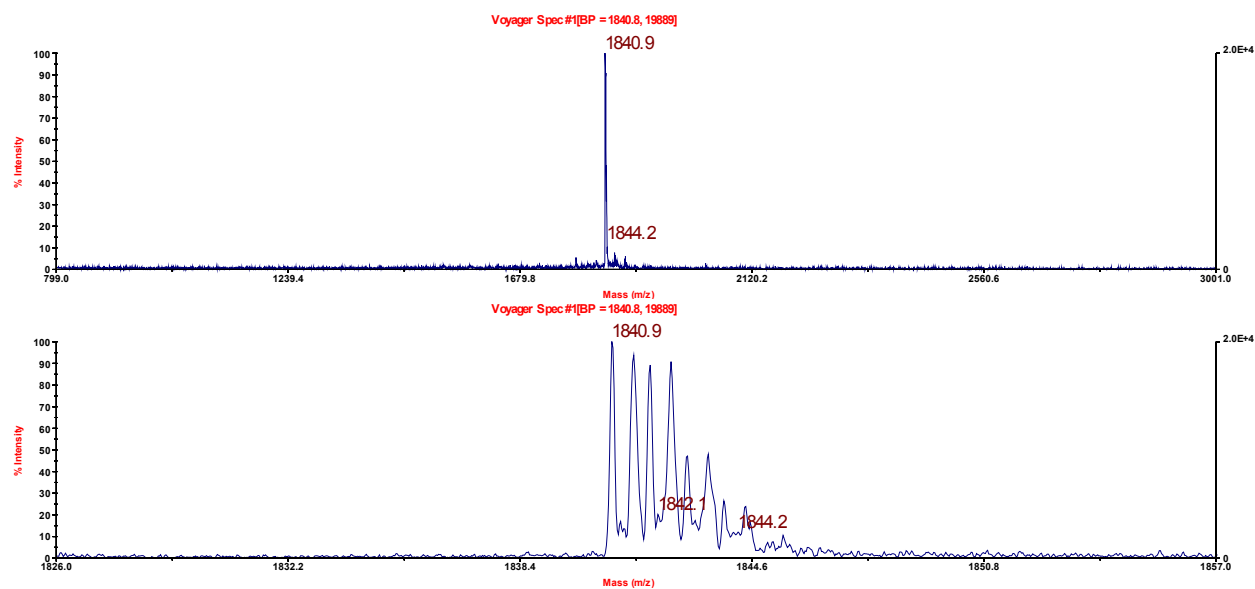

RP-HPLC analysis of the purified peptide 1

Eluent A: water containing 0.05% TFA

Eluent B: CH<sub>3</sub>CN/water: 4/1 by vol containing 0.05% TFA

Linear gradient 0-100% B in 30 min, detection at 215 nm, 50°C

### SAMPLE INFORMATION

|                   |                           |                     |                              |
|-------------------|---------------------------|---------------------|------------------------------|
| Sample Name:      | A15 gd linker COCHO 15 mg | Acquired By:        | eric                         |
| Sample Type:      | Unknown                   | Date Acquired:      | 12/13/2006 2:14:28 PM        |
| Vial:             | 29                        | Acq. Method Set:    | 30 min CH <sub>3</sub> CN MS |
| Injection #:      | 1                         | Date Processed:     | 12/13/2006 3:33:29 PM        |
| Injection Volume: | 80.00 ul                  | Processing Method:  | t                            |
| Run Time:         | 30.0 Minutes              | Channel Name:       | Wvl1 Ch1                     |
| Sample Set Name:  | ca15 a15                  | Proc. Chnl. Descr.: | PDA 215.0 nm                 |
| Colonne:          | C18 Symetrie              | Temperature:        | 50 C                         |

Solvent H<sub>2</sub>O/TFA 0.05%/CH<sub>3</sub>CN 80%

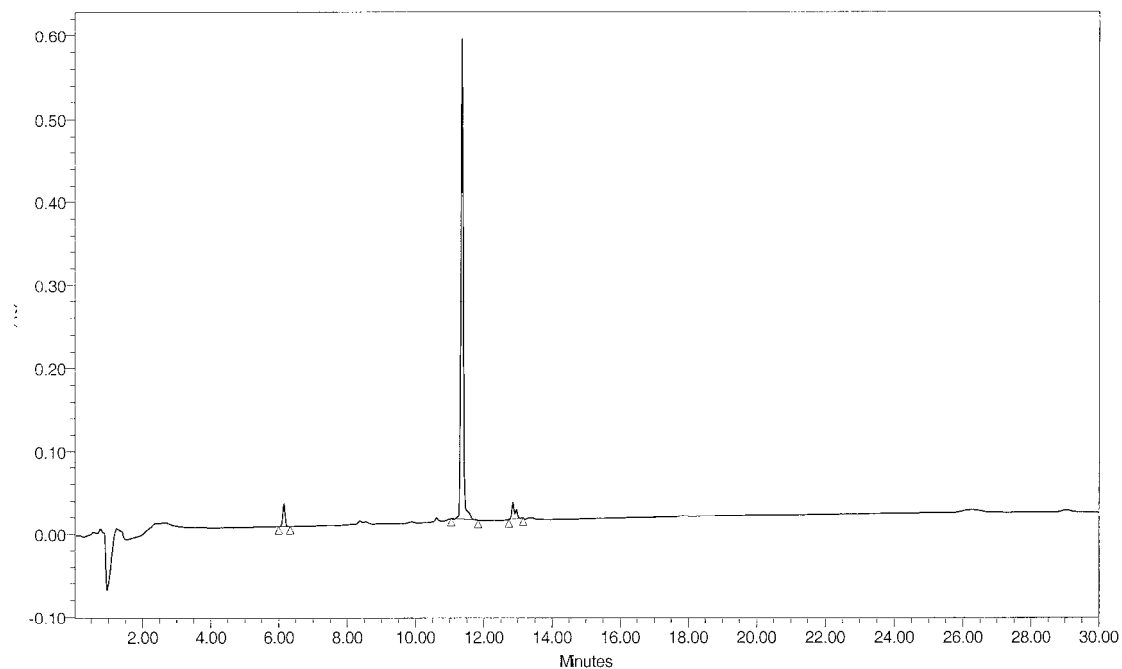

|   | RT     | Area    | % Area | Height |
|---|--------|---------|--------|--------|
| 1 | 6.152  | 131048  | 4.17   | 27864  |
| 2 | 11.356 | 2865042 | 91.21  | 572686 |
| 3 | 12.852 | 144943  | 4.61   | 20170  |
